# Supplementary material for: Undersampled Diffusion-Weighted 129Xe MRI Morphometry of Airspace Enlargement: Feasibility in Chronic Obstructive Pulmonary Disease
Source: MDPI journal article supplement (doi:10.3390/diagnostics13081477), 2023-04-19
Supplement: s1 [file s1]

**Supporting Table S1. Participant listing of imaging measurements and estimates**

|             | D' cm <sup>2</sup> /s | Alpha            | ADC cm <sup>2</sup> /s |                  |                  | <i>L<sub>mD</sub></i> μm |                 |                 | <i>L<sub>m</sub></i> μm |                  |                  |
|-------------|-----------------------|------------------|------------------------|------------------|------------------|--------------------------|-----------------|-----------------|-------------------------|------------------|------------------|
|             |                       |                  | FS                     | AF=2             | AF=3             | FS                       | AF= 2           | AF=3            | FS                      | AF=2             | AF=3             |
| <b>NS</b>   | <b>.03 (.01)</b>      | <b>.67 (.19)</b> | <b>.05 (.02)</b>       | <b>.05 (.01)</b> | <b>.05 (.01)</b> | <b>140 (30)</b>          | <b>130 (30)</b> | <b>140 (30)</b> | <b>280 (130)</b>        | <b>300 (130)</b> | <b>300 (130)</b> |
| NS-1        | .04 (.01)             | .73 (.18)        | .04 (.01)              | .04 (.01)        | .04 (.01)        | 150 (30)                 | 150 (30)        | 150 (30)        | 310 (130)               | 340 (130)        | 340 (130)        |
| NS-2        | .03 (.02)             | .59 (.21)        | .05 (.02)              | .05 (.02)        | .05 (.02)        | 120 (40)                 | 120 (40)        | 120 (40)        | 240 (140)               | 250 (150)        | 260 (150)        |
| NS-3        | .03 (.01)             | .67 (.20)        | .04 (.02)              | .04 (.01)        | .05 (.02)        | 140 (30)                 | 140 (30)        | 140 (30)        | 260 (120)               | 290 (130)        | 290 (120)        |
| NS-4        | .04 (.01)             | .69 (.19)        | .05 (.02)              | .05 (.01)        | .05 (.01)        | 150 (30)                 | 160 (30)        | 150 (30)        | 300 (130)               | 340 (130)        | 300 (110)        |
| <b>COPD</b> | <b>.09 (.04)</b>      | <b>.67 (.20)</b> | <b>.08 (.02)</b>       | <b>.08 (.02)</b> | <b>.08 (.02)</b> | <b>190 (50)</b>          | <b>190 (50)</b> | <b>190 (50)</b> | <b>560 (240)</b>        | <b>570 (250)</b> | <b>580 (250)</b> |
| COPD-1      | .12 (.05)             | .51 (.24)        | .10 (.02)              | .10 (.02)        | .10 (.02)        | 170 (60)                 | 150 (60)        | 150 (60)        | 430 (270)               | 410 (270)        | 420 (270)        |
| COPD-2      | .08 (.03)             | .76 (.18)        | .08 (.02)              | .08 (.02)        | .08 (.02)        | 210 (50)                 | 220 (50)        | 220 (50)        | 650 (240)               | 710 (250)        | 700 (230)        |
| COPD-3      | .08 (.03)             | .69 (.21)        | .07 (.02)              | .07 (.02)        | .07 (.02)        | 190 (50)                 | 180 (50)        | 180 (50)        | 530 (240)               | 520 (250)        | 530 (250)        |
| COPD-4      | .09 (.05)             | .63 (.22)        | .08 (.03)              | .08 (.03)        | .08 (.03)        | 180 (50)                 | 180 (50)        | 180 (50)        | 500 (250)               | 480 (270)        | 510 (270)        |
| COPD-5      | .09 (.03)             | .77 (.14)        | .08 (.02)              | .08 (.02)        | .08 (.02)        | 220 (40)                 | 230 (30)        | 230 (30)        | 690 (210)               | 730 (180)        | 730 (180)        |

FS=Fully Sampled k-space; AF=Acceleration Factor; D'=apparent MRI diffusivity estimate; Alpha=MRI-derived heterogeneity index *L<sub>mD</sub>*=MRI mean airway length scale estimate; *L<sub>m</sub>*=MRI mean linear intercept estimate. NS=Never-Smoker; COPD=ex-smoker with COPD; COPD-5=AATD patient
